# Supplementary material
Source: Springer Nature journal article supplement (https://www.springermedizin.de/resource/supplementary/12889_2013_6441_MOESM1_ESM.pdf/9498112)

# Crude all-cause mortality rates

Crude death rates per 1,000 person

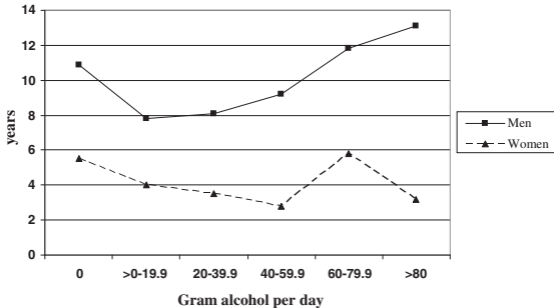

Supplement: MOESM1 [file 9498112]
